# Supplementary material
Source: PubMed Central journal article supplement (PMC3448785)
Supplement: NIHMS297441-supplement-01.pdf [file NIHMS297441-supplement-01.pdf]

**Supplemental Digital Content.** ICD-9-CM- or CPT-Based Classification of Acute Organ Dysfunction

Type of Organ Failure and Code — Description

Respiratory

- 518.81 — Acute respiratory failure
- 518.82 — Acute respiratory distress syndrome
- 518.85 — Acute respiratory distress syndrome after shock or trauma
- 786.09 — Respiratory insufficiency
- 799.1 — Respiratory arrest
- 96.7 — Ventilator management

Cardiovascular

- 458.0 — Hypotension, postural
- 785.5 — Shock
- 785.51 — Shock, cardiogenic
- 785.59 — Shock, circulatory or septic
- 458.0 — Hypotension, postural
- 458.8 — Hypotension, specified type, not elsewhere classified
- 458.9 — Hypotension, arterial, constitutional
- 796.3 — Hypotension, transient

Renal

- 584 — Acute renal failure
- 580 — Acute glomerulonephritis
- 584.5 — Acute renal failure with lesion of tubular necrosis
- 584.6 — Acute renal failure with lesion of renal cortical necrosis
- 584.7 — Acute renal failure with lesion of renal medullary necrosis
- 584.8 — Acute renal failure with other specified pathological lesion in kidney
- 584.9 — Acute renal failure, unspecified

Hepatic

- 570 — Acute hepatic failure or necrosis
- 572.2 — Hepatic encephalopathy
- 573.3 — Hepatitis, septic or unspecified

Hematologic

- 286.2 — Disseminated intravascular coagulation
- 286.6 — Purpura fulminans
- 286.9 — Coagulopathy
- 287.3-5 — Thrombocytopenia, primary, secondary, or unspecified

Supplemental Digital Content. ICD-9-CM– or CPT-Based Classification of Acute Organ Dysfunction (Continued)

Type of Organ Failure and Code — Description

Metabolic

276.2 — Acidosis, metabolic or lactic

Neurologic

293 — Transient organic psychosis

348.1 — Anoxic brain injury

348.3 — Encephalopathy, acute

780.01 — Coma

780.09 — Altered consciousness, unspecified

89.14 — Electroencephalography

ICD-9-CM denotes International Classification of Diseases, Ninth Revision, Clinical Modification, and CPT Current Procedural Terminology adapted from Martin et al(1)
